# Supplementary material for: Hypermethylated-capped selenoprotein mRNAs in mammals
Source: PubMed Central journal article supplement — Nucleic Acids Res. 2014 Jul 10;42(13):8663–77. doi: 10.1093/nar/gku580 (PMC4117793; doi:10.1093/nar/gku580), 2014-07-10
Supplement: supp_gku580_nar-01097-a-2014-File011.pdf [file supp_gku580_nar-01097-a-2014-File011.pdf]

Table S1. Oligonucleotides used for qRT-PCR experiments

| Target         | qRT-PCR oligonucleotides                                         |
|----------------|------------------------------------------------------------------|
| SelT           | Fw : TCCAGATTTGTGTTTCCTGAGG<br>Rev : CTGGGTACCGCTGGCTAATA        |
| Sel15          | Fw : CGGACAGTTCAACCTGCTTC<br>Rev : AATACAGGGTCTGAACCACG          |
| SelM           | Fw : TCCCGATGAGCCTCCTGTTG<br>Rev : ATGGAATGTCCTGCGTGACG          |
| SelW           | Fw : ACGTGGACACAGAAAGCAAG<br>Rev : ACAGCAGCCACGAGAACATC          |
| SelN           | Fw : AGCTTCATCAGCACCTGGTC<br>Rev : CGGAGGTGATGTCCAAGAAG          |
| SelR           | Fw : CAGGTTTTCCAGAATCACTTTG<br>Rev : GGCCATGGAGACGAGTGT          |
| SelK           | Fw : ATCTGATTCCAGATATGATGAT<br>Rev : TGATTGATTCTACCCATTCTTC      |
| SelO           | Fw : GAGGAGTTTGACGCCGAGTTC<br>Rev : GCTCAGCAAGTAGAAGGTGTTTGTG    |
| GPx3           | Fw : GGAGTACATCCCCTTCAAGC<br>Rev : CGAATGGTGCAAGCTCTTCC          |
| GPx4           | Fw : CGGGCTACAACGTCAAATTCG<br>Rev : GGGGCAGGTCCTTCTCTATCA        |
| GPx1           | Fw : TGCAACCAGTTTGGGCATCA<br>Rev : ACCGTTACCTCGCACTTC            |
| TrxR1          | Fw : CCTTATCATCATTGGAGGTGG<br>Rev : AAGAGGGGTGGGAGTGACAAA        |
| SMN            | Fw : CTGATGCTTTGGGAAGTAT<br>Rev : GCCAGCATTCTCCTTAA              |
| Nop58          | Fw : CCATGAACCGCTGGCAGTAG<br>Rev : CCAATCCAAGACACATAGCTG         |
| TGS1           | Fw : GGCTATTACATCAGAGACAGTG<br>Rev : GAATCAAGTTCACTTTCATCCA      |
| snARN U2       | Fw : TTCTCGGCCTTTTGGCTAAG<br>Rev : CTCCCTGCTCCAAAAATCCA          |
| snoARN U3      | Fw : TTCTCTGAACGTGTAGAGCACC<br>Rev : GATCATCAATGGCTGACGGCAG      |
| SBP2           | Fw : GGTTGAGGACAAGTCTGAAGAGCC<br>Rev : CTTTGAGTAGGTCGGTAACACAAGC |
| eIF4E          | Fw : GGCCCACTCTGTAATAGTTC<br>Rev : CCATCAGCAAGAGTACAGC           |
| $\beta$ -actin | Fw : CCTTCTACAATGAGCTGCGT<br>Rev : CTCCTTAATGTCACGCACGAT         |
| LDHA           | Fw : TGGCAGCCTTTTCCTTAGAACA<br>Rev : ACGGCTTTCTCCCTCTTGCTGA      |
| HPRT           | Fw : TGACACTGGCAAAACAATGCA<br>Rev : GGTCCTTTTCACCAGCAAGCT        |

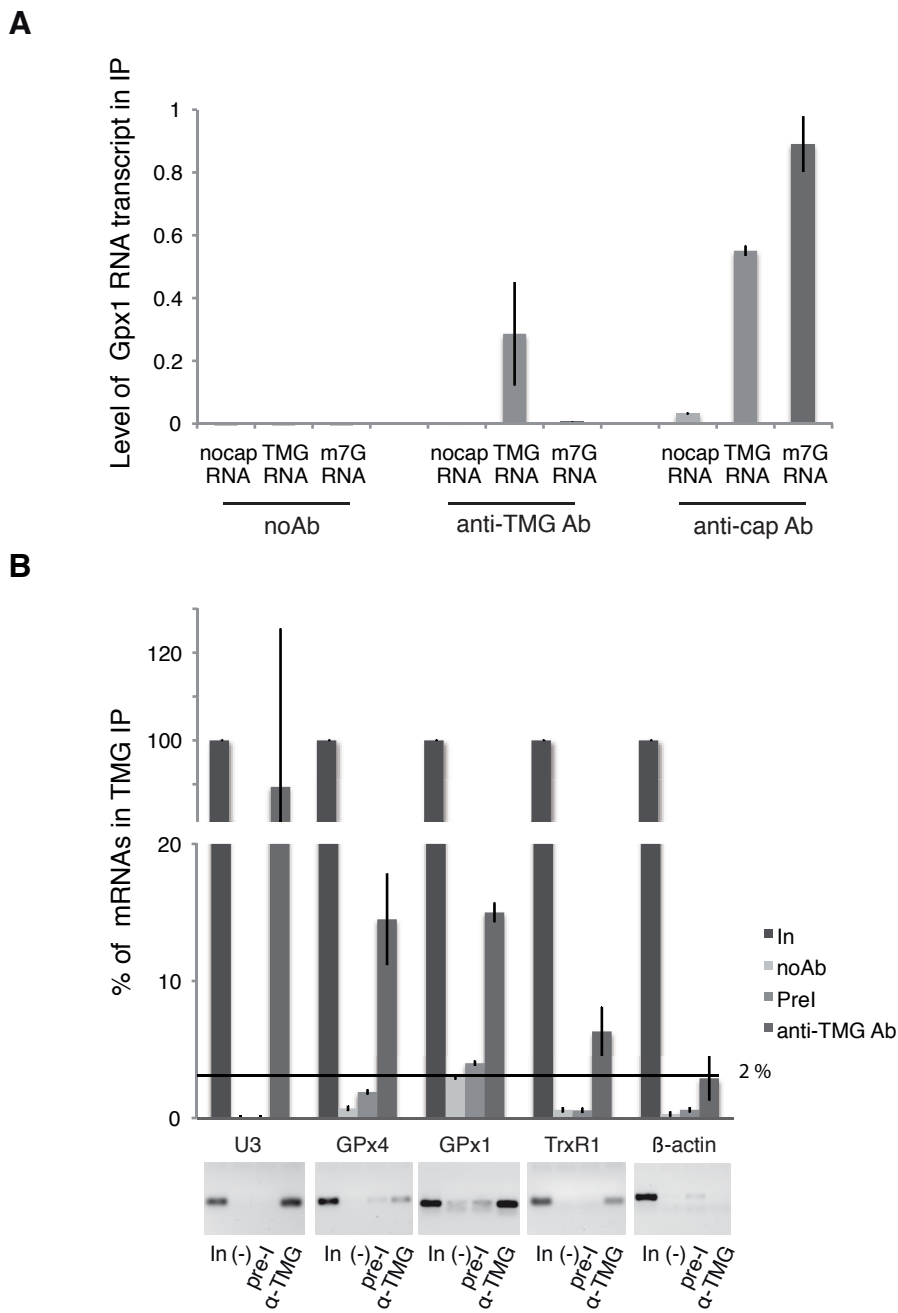

Figure S1: Validation of the anti-TMG serum specificity for TMG-capped RNAs. (A) In vitro transcribed GPx1 RNAs, capped co-transcriptionally with either m3G (TMG RNA) or m7G (m7G RNA) cap analogs were used to test the specificity of TMG-IPs. Non-capped RNAs (nocap RNA) were used as negative controls. Immunoprecipitations were performed with no antibodies, specific anti-TMG serum (anti-m3G R1131 serum, Synaptic Systems) and anti-cap antibodies (anti-m7(m3)G antibodies (Synaptic Systems). Bound GPx1 RNA transcripts were analyzed by qRT-PCR. Maximum RNA binding levels were set to 1. RNA IPs reveal that the anti-TMG serum specifically recognizes TMG-capped RNA but not m7G-capped RNA transcripts while anti-cap antibodies recognize both RNAs. (B) Example total RNA TMG-IP quality control. Total RNA extracted from HEK293FT cells was immunoprecipitated with anti-TMG serum (anti-TMG Ab), no antibodies (noAb or (-)) or unrelated rabbit pre-immune serum (PreI). Bound RNA was analyzed by qRT-PCR. The graphs represents the % of mRNAs in IP compared to the input RNA. The horizontal line represents the level of housekeeping mRNA binding and background (1-2% in average). Background values due to beads or pre-immune serum are retrieved from specific binding values in all subsequent representations. (A, B) Error bars represent standard deviation of an average of 3 independent experiments. Panels below the graph show the RT-PCR products obtained after 35 PCR cycles. In: input 10 %.

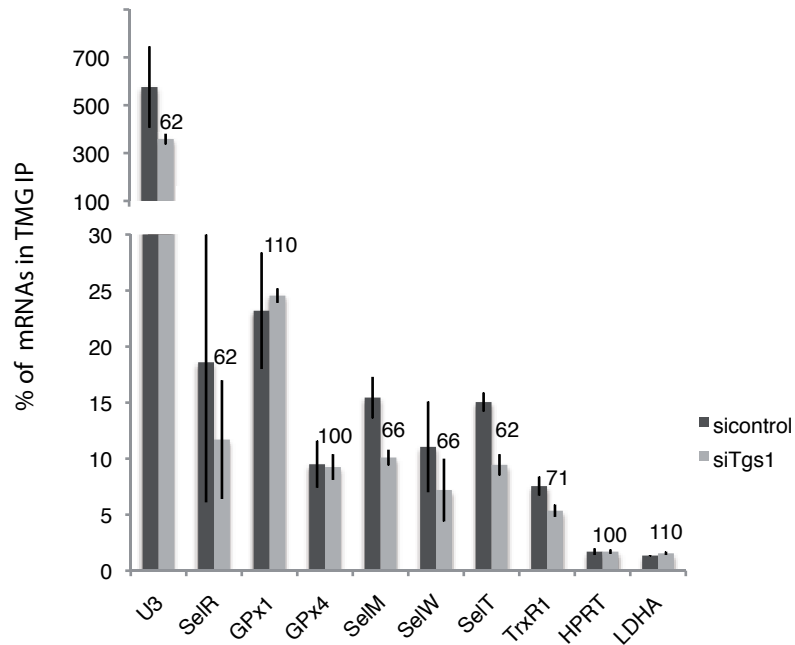

Figure S2: Tgs1 is required for selenoprotein mRNA cap hypermethylation. RNA-IP using anti-TMG serum was performed as described in Fig. 1. The housekeeping HPRT and LDHA mRNAs are negative controls for the TMG-IP.

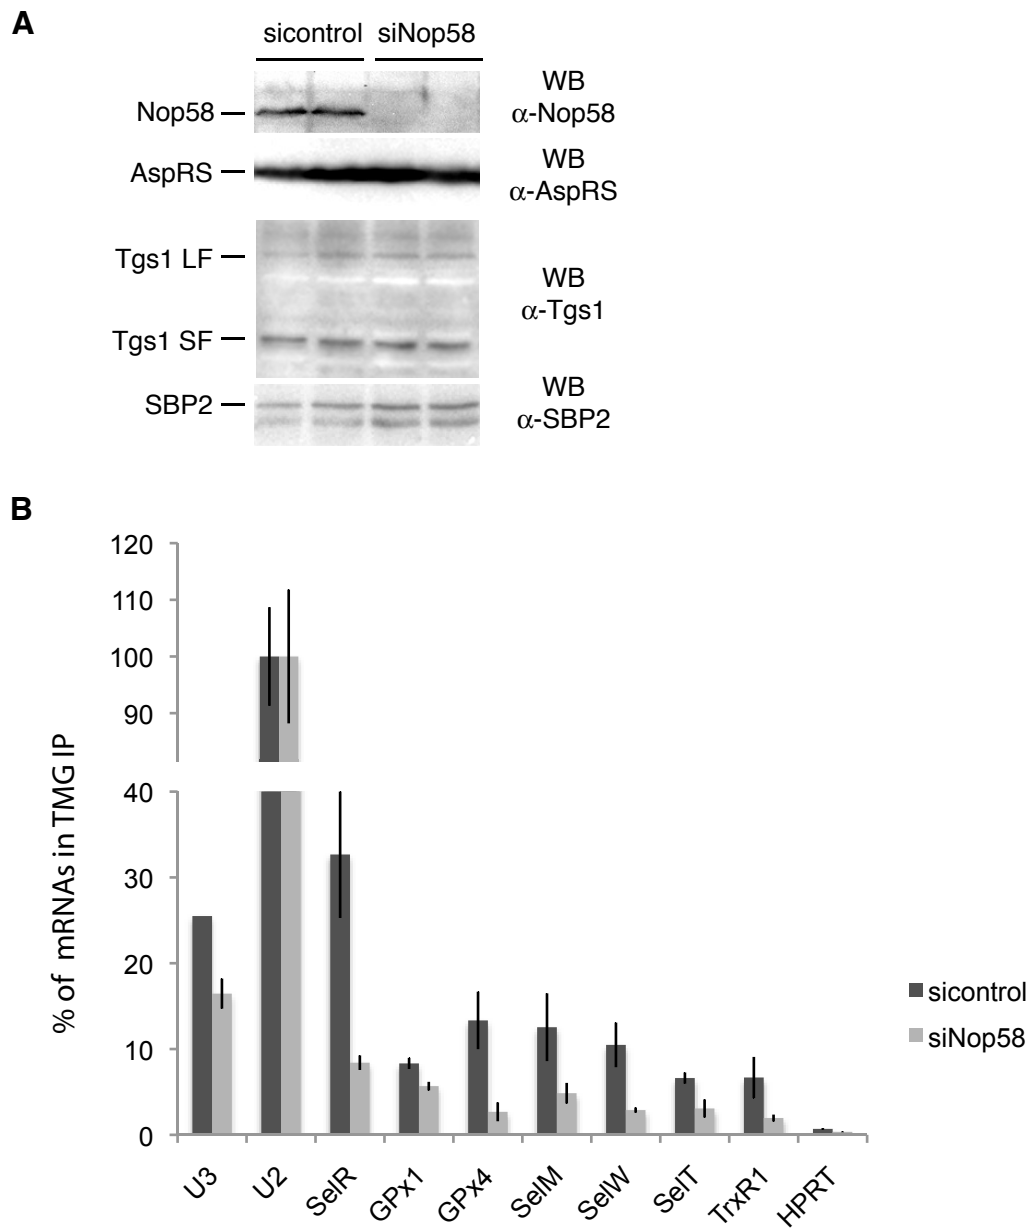

Figure S3: Nop58 is required for cap hypermethylation. (A) Western blot analysis of siNop58 efficiency. Levels of Nop58 protein were reduced to 2% compared to the control, Tgs1 and SBP2 were unaffected. (B) Nop58 contributes to selenoprotein mRNA hypermethylation. RNA-IP using anti-TMG serum was performed as described in Fig. 1.

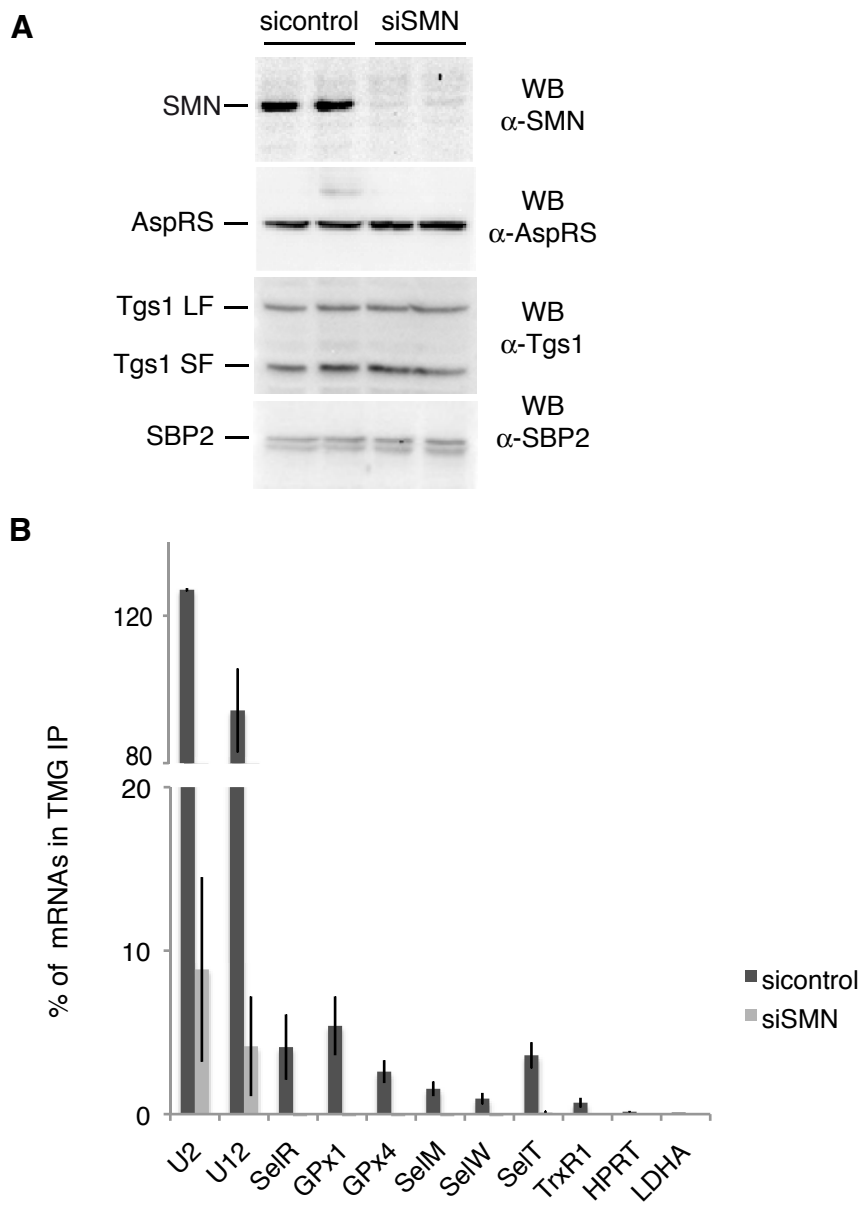

Figure S4: SMN is required for cap hypermethylation. (A) Western blot analysis of siSMN efficiency. Levels of SMN protein were reduced to 8% compared to the control, Tgs1 and SBP2 were unaffected. (B) SMN is required for selenoprotein mRNA hypermethylation. RNA-IP using anti-TMG serum in siSMN conditions were performed as described in Fig. 1.

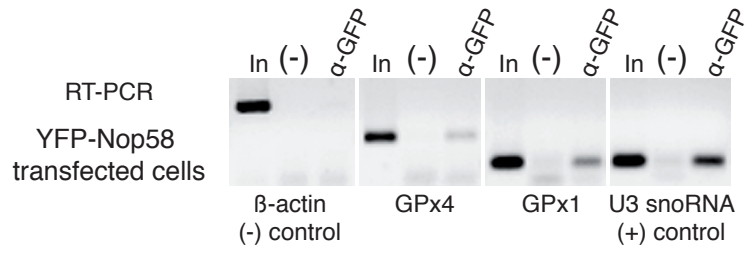

Figure S5: Nop58 interacts with selenoprotein mRNAs in vivo. (A) HEK293FT cells transfected with SBP2 and Nop58-YFP were immunoprecipitated using anti-GFP antibodies. Detection of bound RNAs was done by RT-PCR. In: input 15%; (-) no antibody; U3: positive control;  $\beta$ -actin: negative control.

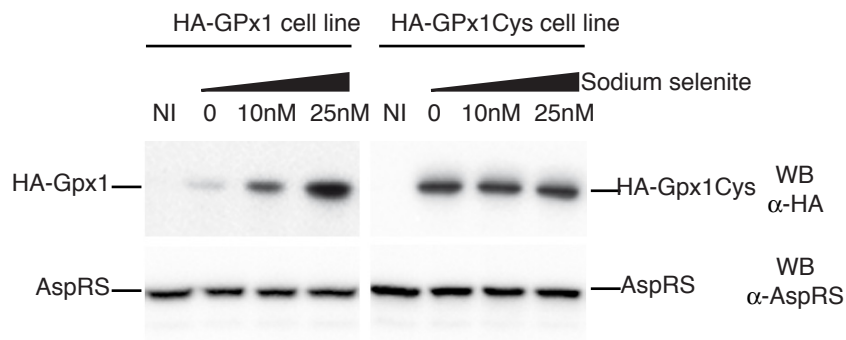

Figure S6: Experimental validation of the stable cell lines HA-GPx1 and HA-GPx1Cys. Western blot analysis of the expression of HA-GPx1 and HA-GPx1Cys proteins using anti-HA antibodies, after doxycycline induction. NI: non induced. The levels of HA-GPx1 protein expression, but not of HA-GPx1Cys, are selenium dependant. Sodium selenite concentrations are indicated above the panels. Western blot using anti-AspRS antibodies were used as control.
